# Supplementary material for: Liver gene regulation of hemostasis-related factors is altered by experimental snake envenomation in mice
Source: PLoS Negl Trop Dis. 2020 Jun 1;14(6):e0008379. doi: 10.1371/journal.pntd.0008379 (PMC7289449; doi:10.1371/journal.pntd.0008379)
Supplement: S1 Table — (PDF) [file pntd.0008379.s001.pdf]

$$3h = 0, 6h = 1, 24h = 2$$

CT salina = 0, B<sub>1</sub>V=2

| Fibonacci dA1 dA2 dA3 |  | dA4 dA5 dA6 |  | dA7 dA8 dA9 |  | dA10 dA11 dA12 |  | dA13 dA14 dA15 |  | dA16 dA17 dA18 |  | dA19 dA20 dA21 |  | dA22 dA23 dA24 |  | dA25 dA26 dA27 |  | dA28 dA29 dA30 |  | dA31 dA32 dA33 |  | dA34 dA35 dA36 |  | dA37 dA38 dA39 |  | dA40 dA41 dA42 |  | dA43 dA44 dA45 |  | dA46 dA47 dA48 |  | dA49 dA50 dA51 |  | dA52 dA53 dA54 |  | dA55 dA56 dA57 |  | dA58 dA59 dA60 |  | dA61 dA62 dA63 |  | dA64 dA65 dA66 |  | dA67 dA68 dA69 |  | dA70 dA71 dA72 |  | dA73 dA74 dA75 |  | dA76 dA77 dA78 |  | dA79 dA80 dA81 |  | dA82 dA83 dA84 |  | dA85 dA86 dA87 |  | dA88 dA89 dA90 |  | dA91 dA92 dA93 |  | dA94 dA95 dA96 |  | dA97 dA98 dA99 |  | dA100 dA101 dA102 |  | dA103 dA104 dA105 |  | dA106 dA107 dA108 |  | dA109 dA110 dA111 |  | dA112 dA113 dA114 |  | dA115 dA116 dA117 |  | dA118 dA119 dA120 |  | dA121 dA122 dA123 |  | dA124 dA125 dA126 |  | dA127 dA128 dA129 |  | dA130 dA131 dA132 |  | dA133 dA134 dA135 |  | dA136 dA137 dA138 |  | dA139 dA140 dA141 |  | dA142 dA143 dA144 |  | dA145 dA146 dA147 |  | dA148 dA149 dA150 |  | dA151 dA152 dA153 |  | dA154 dA155 dA156 |  | dA157 dA158 dA159 |  | dA160 dA161 dA162 |  | dA163 dA164 dA165 |  | dA166 dA167 dA168 |  | dA169 dA170 dA171 |  | dA172 dA173 dA174 |  | dA175 dA176 dA177 |  | dA178 dA179 dA180 |  | dA181 dA182 dA183 |  | dA184 dA185 dA186 |  | dA187 dA188 dA189 |  | dA190 dA191 dA192 |  | dA193 dA194 dA195 |  | dA196 dA197 dA198 |  | dA199 dA200 dA201 |  | dA202 dA203 dA204 |  | dA205 dA206 dA207 |  | dA208 dA209 dA210 |  | dA211 dA212 dA213 |  | dA214 dA215 dA216 |  | dA217 dA218 dA219 |  | dA220 dA221 dA222 |  | dA223 dA224 dA225 |  | dA226 dA227 dA228 |  | dA229 dA230 dA231 |  | dA232 dA233 dA234 |  | dA235 dA236 dA237 |  | dA238 dA239 dA240 |  | dA241 dA242 dA243 |  | dA244 dA245 dA246 |  | dA247 dA248 dA249 |  | dA250 dA251 dA252 |  | dA253 dA254 dA255 |  | dA256 dA257 dA258 |  | dA259 dA260 dA261 |  | dA262 dA263 dA264 |  | dA265 dA266 dA267 |  | dA268 dA269 dA270 |  | dA271 dA272 dA273 |  | dA274 dA275 dA276 |  | dA277 dA278 dA279 |  | dA280 dA281 dA282 |  | dA283 dA284 dA285 |  | dA286 dA287 dA288 |  | dA289 dA290 dA291 |  | dA292 dA293 dA294 |  | dA295 dA296 dA297 |  | dA298 dA299 dA300 |  | dA301 dA302 dA303 |  | dA304 dA305 dA306 |  | dA307 dA308 dA309 |  | dA310 dA311 dA312 |  | dA313 dA314 dA315 |  | dA316 dA317 dA318 |  | dA319 dA320 dA321 |  | dA322 dA323 dA324 |  | dA325 dA326 dA327 |  | dA328 dA329 dA330 |  | dA331 dA332 dA333 |  | dA334 dA335 dA336 |  | dA337 dA338 dA339 |  | dA340 dA341 dA342 |  | dA343 dA344 dA345 |  | dA346 dA347 dA348 |  | dA349 dA350 dA351 |  | dA352 dA353 dA354 |  | dA355 dA356 dA357 |  | dA358 dA359 dA360 |  | dA361 dA362 dA363 |  | dA364 dA365 dA366 |  | dA367 dA368 dA369 |  | dA370 dA371 dA372 |  | dA373 dA374 dA375 |  | dA376 dA377 dA378 |  | dA379 dA380 dA381 |  | dA382 dA383 dA384 |  | dA385 dA386 dA387 |  | dA388 dA389 dA390 |  | dA391 dA392 dA393 |  | dA394 dA395 dA396 |  | dA397 dA398 dA399 |  | dA400 dA401 dA402 |  | dA403 dA404 dA405 |  | dA406 dA407 dA408 |  | dA409 dA410 dA411 |  | dA412 dA413 dA414 |  | dA415 dA416 dA417 |  | dA418 dA419 dA420 |  | dA421 dA422 dA423 |  | dA424 dA425 dA426 |  | dA427 dA428 dA429 |  | dA430 dA431 dA432 |  | dA433 dA434 dA435 |  | dA436 dA437 dA438 |  | dA439 dA440 dA441 |  | dA442 dA443 dA444 |  | dA445 dA446 dA447 |  | dA448 dA449 dA450 |  | dA451 dA452 dA453 |  | dA454 dA455 dA456 |  | dA457 dA458 dA459 |  | dA460 dA461 dA462 |  | dA463 dA464 dA465 |  | dA466 dA467 dA468 |  | dA469 dA470 dA471 |  | dA472 dA473 dA474 |  | dA475 dA476 dA477 |  | dA478 dA479 dA480 |  | dA481 dA482 dA483 |  | dA484 dA485 dA486 |  | dA487 dA488 dA489 |  | dA490 dA491 dA492 |  | dA493 dA494 dA495 |  | dA496 dA497 dA498 |  | dA499 dA500 dA501 |  | dA502 dA503 dA504 |  | dA505 dA506 dA507 |  | dA508 dA509 dA510 |  | dA511 dA512 dA513 |  | dA514 dA515 dA516 |  | dA517 dA518 dA519 |  | dA520 dA521 dA522 |  | dA523 dA524 dA525 |  | dA526 dA527 dA528 |  | dA529 dA530 dA531 |  | dA532 dA533 dA534 |  | dA535 dA536 dA537 |  | dA538 dA539 dA540 |  | dA541 dA542 dA543 |  | dA544 dA545 dA546 |  | dA547 dA548 dA549 |  | dA550 dA551 dA552 |  | dA553 dA554 dA555 |  | dA556 dA557 dA558 |  | dA559 dA560 dA561 |  | dA562 dA563 dA564 |  | dA565 dA566 dA567 |  | dA568 dA569 dA570 |  | dA571 dA572 dA573 |  | dA574 dA575 dA576 |  | dA577 dA578 dA579 |  | dA580 dA581 dA582 |  | dA583 dA584 dA585 |  | dA586 dA587 dA588 |  | dA589 dA590 dA591 |  | dA592 dA593 dA594 |  | dA595 dA596 dA597 |  | dA598 dA599 dA600 |  | dA601 dA602 dA603 |  | dA604 dA605 dA606 |  | dA607 dA608 dA609 |  | dA610 dA611 dA612 |  | dA613 dA614 dA615 |  | dA616 dA617 dA618 |  | dA619 dA620 dA621 |  | dA622 dA623 dA624 |  | dA625 dA626 dA627 |  | dA628 dA629 dA630 |  | dA631 dA632 dA633 |  | dA634 dA635 dA636 |  | dA637 dA638 dA639 |  | dA640 dA641 dA642 |  | dA643 dA644 dA645 |  | dA646 dA647 dA648 |  | dA649 dA650 dA651 |  | dA652 dA653 dA654 |  | dA655 dA656 dA657 |  | dA658 dA659 dA660 |  | dA661 dA662 dA663 |  | dA664 dA665 dA666 |  | dA667 dA668 dA669 |  | dA670 dA671 dA672 |  | dA673 dA674 dA675 |  | dA676 dA677 dA678 |  | dA679 dA680 dA681 |  | dA682 dA683 dA684 |  | dA685 dA686 dA687 |  | dA688 dA689 dA690 |  | dA691 dA692 dA693 |  | dA694 dA695 dA696 |  | dA697 dA698 dA699 |  | dA700 dA701 dA702 |  | dA703 dA704 dA705 |  | dA706 dA707 dA708 |  | dA709 dA710 dA711 |  | dA712 dA713 dA714 |  | dA715 dA716 dA717 |  | dA718 dA719 dA720 |  | dA721 dA722 dA723 |  | dA724 dA725 dA726 |  | dA727 dA728 dA729 |  | dA730 dA731 dA732 |  | dA733 dA734 dA735 |  | dA736 dA737 dA738 |  | dA739 dA740 dA741 |  | dA742 dA743 dA744 |  | dA745 dA746 dA747 |  | dA748 dA749 dA750 |  | dA751 dA752 dA753 |  | dA754 dA755 dA756 |  | dA757 dA758 dA759 |  | dA760 dA761 dA762 |  | dA763 dA764 dA765 |  | dA766 dA767 dA768 |  | dA769 dA770 dA771 |  | dA772 dA773 dA774 |  | dA775 dA776 dA777 |  | dA778 dA779 dA780 |  | dA781 dA782 dA783 |  | dA784 dA785 dA786 |  | dA787 dA788 dA789 |  | dA790 dA791 dA792 |  | dA793 dA794 dA795 |  | dA796 dA797 dA798 |  | dA799 dA800 dA801 |  | dA802 dA803 dA804 |  | dA805 dA806 dA807 |  | dA808 dA809 dA810 |  | dA811 dA812 dA813 |  | dA814 dA815 dA816 |  | dA817 dA818 dA819 |  | dA820 dA821 dA822 |  | dA823 dA824 dA825 |  | dA826 dA827 dA828 |  | dA829 dA830 dA831 |  | dA832 dA833 dA834 |  | dA835 dA836 dA837 |  | dA838 dA839 dA840 |  | dA841 dA842 dA843 |  | dA844 dA845 dA846 |  | dA847 dA848 dA849 |  | dA850 dA851 dA852 |  | dA853 dA854 dA855 |  | dA856 dA857 dA858 |  | dA859 dA860 dA861 |  | dA862 dA863 dA864 |  | dA865 dA866 dA867 |  | dA868 dA869 dA870 |  | dA871 dA872 dA873 |  | dA874 dA875 dA876 |  | dA877 dA878 dA879 |  | dA880 dA881 dA882 |  | dA883 dA884 dA885 |  | dA886 dA887 dA888 |  | dA889 dA890 dA891 |  | dA892 dA893 dA894 |  | dA895 dA896 dA897 |  | dA898 dA899 dA900 |  | dA901 dA902 dA903 |  | dA904 dA905 dA906 |  | dA907 dA908 dA909 |  | dA910 dA911 dA912 |  | dA913 dA914 dA915 |  | dA916 dA917 dA918 |  | dA919 dA920 dA921 |  | dA922 dA923 dA924 |  | dA925 dA926 dA927 |  | dA928 dA929 dA930 |  | dA931 dA932 dA933 |  | dA934 dA935 dA936 |  | dA937 dA938 dA939 |  | dA940 dA941 dA942 |  | dA943 dA944 dA945 |  | dA946 dA947 dA948 |  | dA949 dA950 dA951 |  | dA952 dA953 dA954 |  | dA955 dA956 dA957 |  | dA958 dA959 dA960 |  | dA961 dA962 dA963 |  | dA964 dA965 dA966 |  | dA967 dA968 dA969 |  | dA970 dA971 dA972 |  | dA973 dA974 dA975 |  | dA976 dA977 dA978 |  | dA979 dA980 dA981 |  | dA982 dA983 dA984 |  | dA985 dA986 dA987 |  | dA988 dA989 dA990 |  | dA991 dA992 dA993 |  | dA994 dA995 dA996 |  | dA997 dA998 dA999 |  | dA1000 dA1001 dA1002 |  | dA1003 dA1004 dA1005 |  | dA1006 dA1007 dA1008 |  | dA1009 dA1010 dA1011 |  | dA1012 dA1013 dA1014 |  | dA1015 dA1016 dA1017 |  | dA1018 dA1019 dA1020 |  | dA1021 dA1022 dA1023 |  | dA1024 dA1025 dA1026 |  | dA1027 dA1028 dA1029 |  | dA1030 dA1031 dA1032 |  | dA1033 dA1034 dA1035 |  | dA1036 dA1037 dA1038 |  | dA1039 dA1040 dA1041 |  | dA1042 dA1043 dA1044 |  | dA1045 dA1046 dA1047 |  | dA1048 dA1049 dA1050 |  | dA1051 dA1052 dA1053 |  | dA1054 dA1055 dA1056 |  | dA1057 dA1058 dA1059 |  | dA1060 dA1061 dA1062 |  | dA1063 dA1064 dA1065 |  | dA1066 dA1067 dA1068 |  | dA1069 dA1070 dA1071 |  | dA1072 dA1073 dA1074 |  | dA1075 dA1076 dA1077 |  | dA1078 dA1079 dA1080 |  | dA1081 dA1082 dA1083 |  | dA1084 dA1085 dA1086 |  | dA1087 dA1088 dA1089 |  | dA1090 dA1091 dA1092 |  | dA1093 dA1094 dA1095 |  | dA1096 dA1097 dA1098 |  | dA1099 dA1100 dA1101 |  | dA1102 dA1103 dA1104 |  | dA1105 dA1106 dA1107 |  | dA1108 dA1109 dA1110 |  | dA1111 dA1112 dA1113 |  | dA1114 dA1115 dA1116 |  | dA1117 dA1118 dA1119 |  | dA1120 dA1121 dA1122 |  | dA1123 dA1124 dA1125 |  | dA1126 dA1127 dA1128 |  | dA1129 dA1130 dA1131 |  | dA1132 dA1133 dA1134 |  | dA1135 dA1136 dA1137 |  | dA1138 dA1139 dA1140 |  | dA1141 dA1142 dA1143 |  | dA1144 dA1145 dA1146 |  | dA1147 dA1148 dA1149 |  | dA1150 dA1151 dA1152 |  | dA1153 dA1154 dA1155 |  | dA1156 dA1157 dA1158 |  | dA1159 dA1160 dA1161 |  | dA1162 dA1163 dA1164 |  | dA1165 dA1166 dA1167 |  | dA1168 dA1169 dA1170 |  | dA1171 dA1172 dA1173 |  | dA1174 dA1175 dA1176 |  | dA1177 dA1178 dA1179 |  | dA1180 dA1181 dA1182 |  | dA1183 dA1184 dA1185 |  | dA1186 dA1187 dA1188 |  | dA1189 dA1190 dA1191 |  | dA1192 dA1193 dA1194 |  | dA1195 dA1196 dA1197 |  | dA1198 dA1199 dA1200 |  | dA1201 dA1202 dA1203 |  | dA1204 dA1205 dA1206 |  | dA1207 dA1208 dA1209 |  | dA1210 dA1211 dA1212 |  | dA1213 dA1214 dA1215 |  | dA1216 dA1217 dA1218 |  | dA1219 dA1220 dA1221 |  | dA1222 dA1223 dA1224 |  | dA1225 dA1226 dA1227 |  | dA1228 dA1229 dA1230 |  | dA1231 dA1232 dA1233 |  | dA1234 dA1235 dA1236 |  | dA1237 dA1238 dA1239 |  | dA1240 dA1241 dA1242 |  | dA1243 dA1244 dA1245 |  | dA1246 dA1247 dA1248 |  | dA1249 dA1250 dA1251 |  | dA1252 dA1253 dA1254 |  | dA1255 dA1256 dA1257 |  | dA1258 dA1259 dA1260 |  | dA1261 dA1262 dA1263 |  | dA1264 dA1265 dA1266 |  | dA1267 dA1268 dA1269 |  | dA1270 dA1271 dA1272 |  | dA1273 dA1274 dA1275 |  | dA1276 dA1277 dA1278 |  | dA1279 dA1280 dA1281 |  | dA1282 dA1283 dA1284 |  | dA1285 dA1286 dA1287 |  | dA1288 dA1289 dA1290 |  | dA1291 dA1292 dA1293 |  | dA1294 dA1295 dA1296 |  | dA1297 dA1298 dA1299 |  | dA1300 dA1301 dA1302 |  | dA1303 dA1304 dA1305 |  | dA1306 dA1307 dA1308 |  | dA1309 dA1310 dA1311 |  | dA1312 dA1313 dA1314 |  | dA1315 dA1316 dA1317 |  | dA1318 dA1319 dA1320 |  | dA1321 dA1322 dA1323 |  | dA1324 dA1325 dA1326 |  | dA1327 dA1328 dA1329 |  | dA1330 dA1331 dA1332 |  | dA1333 dA1334 dA1335 |  | dA1336 dA1337 dA1338 |  | dA1339 dA1340 dA1341 |  | dA1342 dA1343 dA1344 |  | dA1345 dA1346 dA1347 |  | dA1348 dA1349 dA1350 |  | dA1351 dA1352 dA1353 |  | dA1354 dA1355 dA1356 |  | dA1357 dA1358 dA1359 |  | dA1360 dA1361 dA1362 |  | dA1363 dA1364 dA1365 |  | dA1366 dA1367 dA1368 |  | dA1369 dA1370 dA1371 |  | dA1372 dA1373 dA1374 |  | dA1375 dA1376 dA1377 |  | dA1378 dA1379 dA1380 |  | dA1381 dA1382 dA1383 |  | dA1384 dA1385 dA1386 |  | dA1387 dA1388 dA1389 |  | dA1390 dA1391 dA1392 |  | dA1393 dA1394 dA1395 |  | dA1396 dA1397 dA1398 |  | dA1399 dA1400 dA1401 |  | dA1402 dA1403 dA1404 |  | dA1405 dA1406 dA1407 |  | dA1408 dA1409 dA1410 |  | dA1411 dA1412 dA1413 |  | dA1414 dA1415 dA1416 |  | dA1417 dA1418 dA1419 |  | dA1420 dA1421 dA1422 |  | dA1423 dA1424 dA1425 |  | dA1426 dA1427 dA1428 |  | dA1429 dA1430 dA1431 |  | dA1432 dA1433 dA1434 |  | dA1435 dA1436 dA1437 |  | dA1438 dA1439 dA1440 |  | dA1441 dA1442 dA1443 |  | dA1444 dA1445 dA1446 |  | dA1447 dA1448 dA1449 |  | dA1450 dA1451 dA1452 |  | dA1453 dA1454 dA1455 |  | dA1456 dA1457 dA1458 |  | dA1459 dA1460 dA1461 |  | dA1462 dA1463 dA1464 |  | dA1465 dA1466 dA1467 |  | dA1468 dA1469 dA1470 |  | dA1471 dA1472 dA1473 |  | dA1474 dA1475 dA1476 |  | dA1477 dA1478 dA1479 |  | dA1480 dA1481 dA1482 |  | dA1483 dA1484 dA1485 |  | dA1486 dA1487 dA1488 |  | dA1489 dA1490 dA1491 |  | dA1492 dA1493 dA1494 |  | dA1495 dA1496 dA1497 |  | dA1498 dA1499 dA1500 |  | dA1501 dA1502 dA1503 |  | dA1504 dA1505 dA1506 |  | dA1507 dA1508 dA1509 |  | dA1510 dA1511 dA1512 |  | dA1513 dA1514 dA1515 |  | dA1516 dA1517 dA1518 |  | dA1519 dA1520 dA1521 |  | dA1522 dA1523 dA1524 |  | dA1525 dA1526 dA1527 |  | dA1528 dA1529 dA1530 |  | dA1531 dA1532 dA1533 |  | dA1534 dA1535 dA1536 |  | dA1537 dA1538 dA1539 |  | dA1540 dA1541 dA1542 |  | dA1543 dA1544 dA1545 |  | dA1546 dA1547 dA1548 |  | dA1549 dA1550 dA1551 |  | dA1552 dA1553 dA1554 |  | dA1555 dA155 |  |
|-----------------------|--|-------------|--|-------------|--|----------------|--|----------------|--|----------------|--|----------------|--|----------------|--|----------------|--|----------------|--|----------------|--|----------------|--|----------------|--|----------------|--|----------------|--|----------------|--|----------------|--|----------------|--|----------------|--|----------------|--|----------------|--|----------------|--|----------------|--|----------------|--|----------------|--|----------------|--|----------------|--|----------------|--|----------------|--|----------------|--|----------------|--|----------------|--|----------------|--|-------------------|--|-------------------|--|-------------------|--|-------------------|--|-------------------|--|-------------------|--|-------------------|--|-------------------|--|-------------------|--|-------------------|--|-------------------|--|-------------------|--|-------------------|--|-------------------|--|-------------------|--|-------------------|--|-------------------|--|-------------------|--|-------------------|--|-------------------|--|-------------------|--|-------------------|--|-------------------|--|-------------------|--|-------------------|--|-------------------|--|-------------------|--|-------------------|--|-------------------|--|-------------------|--|-------------------|--|-------------------|--|-------------------|--|-------------------|--|-------------------|--|-------------------|--|-------------------|--|-------------------|--|-------------------|--|-------------------|--|-------------------|--|-------------------|--|-------------------|--|-------------------|--|-------------------|--|-------------------|--|-------------------|--|-------------------|--|-------------------|--|-------------------|--|-------------------|--|-------------------|--|-------------------|--|-------------------|--|-------------------|--|-------------------|--|-------------------|--|-------------------|--|-------------------|--|-------------------|--|-------------------|--|-------------------|--|-------------------|--|-------------------|--|-------------------|--|-------------------|--|-------------------|--|-------------------|--|-------------------|--|-------------------|--|-------------------|--|-------------------|--|-------------------|--|-------------------|--|-------------------|--|-------------------|--|-------------------|--|-------------------|--|-------------------|--|-------------------|--|-------------------|--|-------------------|--|-------------------|--|-------------------|--|-------------------|--|-------------------|--|-------------------|--|-------------------|--|-------------------|--|-------------------|--|-------------------|--|-------------------|--|-------------------|--|-------------------|--|-------------------|--|-------------------|--|-------------------|--|-------------------|--|-------------------|--|-------------------|--|-------------------|--|-------------------|--|-------------------|--|-------------------|--|-------------------|--|-------------------|--|-------------------|--|-------------------|--|-------------------|--|-------------------|--|-------------------|--|-------------------|--|-------------------|--|-------------------|--|-------------------|--|-------------------|--|-------------------|--|-------------------|--|-------------------|--|-------------------|--|-------------------|--|-------------------|--|-------------------|--|-------------------|--|-------------------|--|-------------------|--|-------------------|--|-------------------|--|-------------------|--|-------------------|--|-------------------|--|-------------------|--|-------------------|--|-------------------|--|-------------------|--|-------------------|--|-------------------|--|-------------------|--|-------------------|--|-------------------|--|-------------------|--|-------------------|--|-------------------|--|-------------------|--|-------------------|--|-------------------|--|-------------------|--|-------------------|--|-------------------|--|-------------------|--|-------------------|--|-------------------|--|-------------------|--|-------------------|--|-------------------|--|-------------------|--|-------------------|--|-------------------|--|-------------------|--|-------------------|--|-------------------|--|-------------------|--|-------------------|--|-------------------|--|-------------------|--|-------------------|--|-------------------|--|-------------------|--|-------------------|--|-------------------|--|-------------------|--|-------------------|--|-------------------|--|-------------------|--|-------------------|--|-------------------|--|-------------------|--|-------------------|--|-------------------|--|-------------------|--|-------------------|--|-------------------|--|-------------------|--|-------------------|--|-------------------|--|-------------------|--|-------------------|--|-------------------|--|-------------------|--|-------------------|--|-------------------|--|-------------------|--|-------------------|--|-------------------|--|-------------------|--|-------------------|--|-------------------|--|-------------------|--|-------------------|--|-------------------|--|-------------------|--|-------------------|--|-------------------|--|-------------------|--|-------------------|--|-------------------|--|-------------------|--|-------------------|--|-------------------|--|-------------------|--|-------------------|--|-------------------|--|-------------------|--|-------------------|--|-------------------|--|-------------------|--|-------------------|--|-------------------|--|-------------------|--|-------------------|--|-------------------|--|-------------------|--|-------------------|--|-------------------|--|-------------------|--|-------------------|--|-------------------|--|-------------------|--|-------------------|--|-------------------|--|-------------------|--|-------------------|--|-------------------|--|-------------------|--|-------------------|--|-------------------|--|-------------------|--|-------------------|--|-------------------|--|-------------------|--|-------------------|--|-------------------|--|-------------------|--|-------------------|--|-------------------|--|-------------------|--|-------------------|--|-------------------|--|-------------------|--|-------------------|--|-------------------|--|-------------------|--|-------------------|--|-------------------|--|-------------------|--|-------------------|--|-------------------|--|-------------------|--|-------------------|--|-------------------|--|-------------------|--|-------------------|--|-------------------|--|-------------------|--|-------------------|--|-------------------|--|-------------------|--|-------------------|--|-------------------|--|-------------------|--|-------------------|--|-------------------|--|-------------------|--|-------------------|--|-------------------|--|-------------------|--|-------------------|--|-------------------|--|-------------------|--|-------------------|--|-------------------|--|-------------------|--|-------------------|--|-------------------|--|-------------------|--|-------------------|--|-------------------|--|-------------------|--|-------------------|--|-------------------|--|-------------------|--|-------------------|--|-------------------|--|-------------------|--|-------------------|--|-------------------|--|-------------------|--|-------------------|--|-------------------|--|-------------------|--|----------------------|--|----------------------|--|----------------------|--|----------------------|--|----------------------|--|----------------------|--|----------------------|--|----------------------|--|----------------------|--|----------------------|--|----------------------|--|----------------------|--|----------------------|--|----------------------|--|----------------------|--|----------------------|--|----------------------|--|----------------------|--|----------------------|--|----------------------|--|----------------------|--|----------------------|--|----------------------|--|----------------------|--|----------------------|--|----------------------|--|----------------------|--|----------------------|--|----------------------|--|----------------------|--|----------------------|--|----------------------|--|----------------------|--|----------------------|--|----------------------|--|----------------------|--|----------------------|--|----------------------|--|----------------------|--|----------------------|--|----------------------|--|----------------------|--|----------------------|--|----------------------|--|----------------------|--|----------------------|--|----------------------|--|----------------------|--|----------------------|--|----------------------|--|----------------------|--|----------------------|--|----------------------|--|----------------------|--|----------------------|--|----------------------|--|----------------------|--|----------------------|--|----------------------|--|----------------------|--|----------------------|--|----------------------|--|----------------------|--|----------------------|--|----------------------|--|----------------------|--|----------------------|--|----------------------|--|----------------------|--|----------------------|--|----------------------|--|----------------------|--|----------------------|--|----------------------|--|----------------------|--|----------------------|--|----------------------|--|----------------------|--|----------------------|--|----------------------|--|----------------------|--|----------------------|--|----------------------|--|----------------------|--|----------------------|--|----------------------|--|----------------------|--|----------------------|--|----------------------|--|----------------------|--|----------------------|--|----------------------|--|----------------------|--|----------------------|--|----------------------|--|----------------------|--|----------------------|--|----------------------|--|----------------------|--|----------------------|--|----------------------|--|----------------------|--|----------------------|--|----------------------|--|----------------------|--|----------------------|--|----------------------|--|----------------------|--|----------------------|--|----------------------|--|----------------------|--|----------------------|--|----------------------|--|----------------------|--|----------------------|--|----------------------|--|----------------------|--|----------------------|--|----------------------|--|----------------------|--|----------------------|--|----------------------|--|----------------------|--|----------------------|--|----------------------|--|----------------------|--|----------------------|--|----------------------|--|----------------------|--|----------------------|--|----------------------|--|----------------------|--|----------------------|--|----------------------|--|----------------------|--|----------------------|--|----------------------|--|----------------------|--|----------------------|--|----------------------|--|----------------------|--|----------------------|--|----------------------|--|----------------------|--|----------------------|--|----------------------|--|----------------------|--|----------------------|--|----------------------|--|----------------------|--|----------------------|--|----------------------|--|----------------------|--|----------------------|--|----------------------|--|----------------------|--|----------------------|--|----------------------|--|----------------------|--|----------------------|--|----------------------|--|----------------------|--|----------------------|--|----------------------|--|----------------------|--|----------------------|--|----------------------|--|----------------------|--|----------------------|--|----------------------|--|----------------------|--|----------------------|--|----------------------|--|----------------------|--|----------------------|--|----------------------|--|----------------------|--|----------------------|--|----------------------|--|----------------------|--|----------------------|--|----------------------|--|----------------------|--|----------------------|--|----------------------|--|--------------|--|
|-----------------------|--|-------------|--|-------------|--|----------------|--|----------------|--|----------------|--|----------------|--|----------------|--|----------------|--|----------------|--|----------------|--|----------------|--|----------------|--|----------------|--|----------------|--|----------------|--|----------------|--|----------------|--|----------------|--|----------------|--|----------------|--|----------------|--|----------------|--|----------------|--|----------------|--|----------------|--|----------------|--|----------------|--|----------------|--|----------------|--|----------------|--|----------------|--|----------------|--|-------------------|--|-------------------|--|-------------------|--|-------------------|--|-------------------|--|-------------------|--|-------------------|--|-------------------|--|-------------------|--|-------------------|--|-------------------|--|-------------------|--|-------------------|--|-------------------|--|-------------------|--|-------------------|--|-------------------|--|-------------------|--|-------------------|--|-------------------|--|-------------------|--|-------------------|--|-------------------|--|-------------------|--|-------------------|--|-------------------|--|-------------------|--|-------------------|--|-------------------|--|-------------------|--|-------------------|--|-------------------|--|-------------------|--|-------------------|--|-------------------|--|-------------------|--|-------------------|--|-------------------|--|-------------------|--|-------------------|--|-------------------|--|-------------------|--|-------------------|--|-------------------|--|-------------------|--|-------------------|--|-------------------|--|-------------------|--|-------------------|--|-------------------|--|-------------------|--|-------------------|--|-------------------|--|-------------------|--|-------------------|--|-------------------|--|-------------------|--|-------------------|--|-------------------|--|-------------------|--|-------------------|--|-------------------|--|-------------------|--|-------------------|--|-------------------|--|-------------------|--|-------------------|--|-------------------|--|-------------------|--|-------------------|--|-------------------|--|-------------------|--|-------------------|--|-------------------|--|-------------------|--|-------------------|--|-------------------|--|-------------------|--|-------------------|--|-------------------|--|-------------------|--|-------------------|--|-------------------|--|-------------------|--|-------------------|--|-------------------|--|-------------------|--|-------------------|--|-------------------|--|-------------------|--|-------------------|--|-------------------|--|-------------------|--|-------------------|--|-------------------|--|-------------------|--|-------------------|--|-------------------|--|-------------------|--|-------------------|--|-------------------|--|-------------------|--|-------------------|--|-------------------|--|-------------------|--|-------------------|--|-------------------|--|-------------------|--|-------------------|--|-------------------|--|-------------------|--|-------------------|--|-------------------|--|-------------------|--|-------------------|--|-------------------|--|-------------------|--|-------------------|--|-------------------|--|-------------------|--|-------------------|--|-------------------|--|-------------------|--|-------------------|--|-------------------|--|-------------------|--|-------------------|--|-------------------|--|-------------------|--|-------------------|--|-------------------|--|-------------------|--|-------------------|--|-------------------|--|-------------------|--|-------------------|--|-------------------|--|-------------------|--|-------------------|--|-------------------|--|-------------------|--|-------------------|--|-------------------|--|-------------------|--|-------------------|--|-------------------|--|-------------------|--|-------------------|--|-------------------|--|-------------------|--|-------------------|--|-------------------|--|-------------------|--|-------------------|--|-------------------|--|-------------------|--|-------------------|--|-------------------|--|-------------------|--|-------------------|--|-------------------|--|-------------------|--|-------------------|--|-------------------|--|-------------------|--|-------------------|--|-------------------|--|-------------------|--|-------------------|--|-------------------|--|-------------------|--|-------------------|--|-------------------|--|-------------------|--|-------------------|--|-------------------|--|-------------------|--|-------------------|--|-------------------|--|-------------------|--|-------------------|--|-------------------|--|-------------------|--|-------------------|--|-------------------|--|-------------------|--|-------------------|--|-------------------|--|-------------------|--|-------------------|--|-------------------|--|-------------------|--|-------------------|--|-------------------|--|-------------------|--|-------------------|--|-------------------|--|-------------------|--|-------------------|--|-------------------|--|-------------------|--|-------------------|--|-------------------|--|-------------------|--|-------------------|--|-------------------|--|-------------------|--|-------------------|--|-------------------|--|-------------------|--|-------------------|--|-------------------|--|-------------------|--|-------------------|--|-------------------|--|-------------------|--|-------------------|--|-------------------|--|-------------------|--|-------------------|--|-------------------|--|-------------------|--|-------------------|--|-------------------|--|-------------------|--|-------------------|--|-------------------|--|-------------------|--|-------------------|--|-------------------|--|-------------------|--|-------------------|--|-------------------|--|-------------------|--|-------------------|--|-------------------|--|-------------------|--|-------------------|--|-------------------|--|-------------------|--|-------------------|--|-------------------|--|-------------------|--|-------------------|--|-------------------|--|-------------------|--|-------------------|--|-------------------|--|-------------------|--|-------------------|--|-------------------|--|-------------------|--|-------------------|--|-------------------|--|-------------------|--|-------------------|--|-------------------|--|-------------------|--|-------------------|--|-------------------|--|-------------------|--|-------------------|--|-------------------|--|-------------------|--|-------------------|--|-------------------|--|-------------------|--|-------------------|--|-------------------|--|-------------------|--|-------------------|--|-------------------|--|-------------------|--|-------------------|--|-------------------|--|-------------------|--|-------------------|--|-------------------|--|-------------------|--|-------------------|--|-------------------|--|-------------------|--|-------------------|--|-------------------|--|-------------------|--|-------------------|--|-------------------|--|-------------------|--|-------------------|--|-------------------|--|-------------------|--|-------------------|--|-------------------|--|-------------------|--|-------------------|--|-------------------|--|-------------------|--|-------------------|--|-------------------|--|-------------------|--|----------------------|--|----------------------|--|----------------------|--|----------------------|--|----------------------|--|----------------------|--|----------------------|--|----------------------|--|----------------------|--|----------------------|--|----------------------|--|----------------------|--|----------------------|--|----------------------|--|----------------------|--|----------------------|--|----------------------|--|----------------------|--|----------------------|--|----------------------|--|----------------------|--|----------------------|--|----------------------|--|----------------------|--|----------------------|--|----------------------|--|----------------------|--|----------------------|--|----------------------|--|----------------------|--|----------------------|--|----------------------|--|----------------------|--|----------------------|--|----------------------|--|----------------------|--|----------------------|--|----------------------|--|----------------------|--|----------------------|--|----------------------|--|----------------------|--|----------------------|--|----------------------|--|----------------------|--|----------------------|--|----------------------|--|----------------------|--|----------------------|--|----------------------|--|----------------------|--|----------------------|--|----------------------|--|----------------------|--|----------------------|--|----------------------|--|----------------------|--|----------------------|--|----------------------|--|----------------------|--|----------------------|--|----------------------|--|----------------------|--|----------------------|--|----------------------|--|----------------------|--|----------------------|--|----------------------|--|----------------------|--|----------------------|--|----------------------|--|----------------------|--|----------------------|--|----------------------|--|----------------------|--|----------------------|--|----------------------|--|----------------------|--|----------------------|--|----------------------|--|----------------------|--|----------------------|--|----------------------|--|----------------------|--|----------------------|--|----------------------|--|----------------------|--|----------------------|--|----------------------|--|----------------------|--|----------------------|--|----------------------|--|----------------------|--|----------------------|--|----------------------|--|----------------------|--|----------------------|--|----------------------|--|----------------------|--|----------------------|--|----------------------|--|----------------------|--|----------------------|--|----------------------|--|----------------------|--|----------------------|--|----------------------|--|----------------------|--|----------------------|--|----------------------|--|----------------------|--|----------------------|--|----------------------|--|----------------------|--|----------------------|--|----------------------|--|----------------------|--|----------------------|--|----------------------|--|----------------------|--|----------------------|--|----------------------|--|----------------------|--|----------------------|--|----------------------|--|----------------------|--|----------------------|--|----------------------|--|----------------------|--|----------------------|--|----------------------|--|----------------------|--|----------------------|--|----------------------|--|----------------------|--|----------------------|--|----------------------|--|----------------------|--|----------------------|--|----------------------|--|----------------------|--|----------------------|--|----------------------|--|----------------------|--|----------------------|--|----------------------|--|----------------------|--|----------------------|--|----------------------|--|----------------------|--|----------------------|--|----------------------|--|----------------------|--|----------------------|--|----------------------|--|----------------------|--|----------------------|--|----------------------|--|----------------------|--|----------------------|--|----------------------|--|----------------------|--|----------------------|--|----------------------|--|----------------------|--|----------------------|--|----------------------|--|----------------------|--|----------------------|--|----------------------|--|----------------------|--|----------------------|--|----------------------|--|----------------------|--|----------------------|--|----------------------|--|----------------------|--|----------------------|--|----------------------|--|----------------------|--|----------------------|--|----------------------|--|----------------------|--|----------------------|--|----------------------|--|--------------|--|
